1 **Low-efficiency conversion of proliferative glia into induced neurons by Ascl1 in the postnatal**  
2 **mouse cerebral cortex *in vivo***

3  
4 **Chiara Galante<sup>1</sup>, Nicolás Marichal<sup>2</sup>, Carol Schuurmans<sup>3,4,5</sup>, Benedikt Berninger<sup>1,2,6,7,8\*</sup>, Sophie**  
5 **Péron<sup>1,2\*</sup>**

6 <sup>1</sup>Research Group “Adult Neurogenesis and Cellular Reprogramming”, Institute of Physiological  
7 Chemistry, University Medical Center Johannes Gutenberg University, Mainz, Germany

8 <sup>2</sup>Centre for Developmental Neurobiology, Institute of Psychiatry, Psychology & Neuroscience,  
9 King's College London, United Kingdom

10 <sup>3</sup>Biological Sciences Platform, Sunnybrook Research Institute (SRI), Toronto, ON, Canada.

11 <sup>4</sup>Department of Biochemistry, University of Toronto, Toronto, ON, Canada.

12 <sup>5</sup>Department of Laboratory Medicine and Pathobiology, University of Toronto, Toronto, ON,  
13 Canada.

14 <sup>6</sup>MRC Centre for Neurodevelopmental Disorders, Institute of Psychiatry, Psychology &  
15 Neuroscience, King's College London, London, United Kingdom

16 <sup>7</sup>The Francis Crick Institute, London, United Kingdom

17 <sup>8</sup>Focus Program Translational Neuroscience, Johannes Gutenberg University, Mainz, Germany

18 **\* Correspondence:**

19 Sophie Péron

20 [sopperon@uni-mainz.de](mailto:sopperon@uni-mainz.de)

21 Benedikt Berninger

22 [benedikt.berninger@kcl.ac.uk](mailto:benedikt.berninger@kcl.ac.uk)

23

24 **Keywords: lineage reprogramming, neurogenesis, astrocyte, oligodendrocyte, proneural,**  
25 **transcription factor, post-translational modification**

26

27 **ABSTRACT**

28 The proneural transcription factor Achaete-scute complex-like 1 (Ascl1) is a major regulator of  
29 neural progenitor fate, implicated both in neurogenesis and oligodendroglialogenesis. Ascl1 has been  
30 widely used to reprogram non-neuronal cells into induced neurons. *In vitro*, Ascl1 induces efficient  
31 reprogramming of proliferative astroglia from the early postnatal cerebral cortex into interneuron-like  
32 cells. Here, we examined whether Ascl1 can similarly induce neuronal reprogramming of glia  
33 undergoing proliferation in the postnatal mouse cerebral cortex *in vivo*. Toward this, we targeted

34 cortical glia at the peak of proliferative expansion (i.e., postnatal day 5) by injecting a retrovirus  
35 encoding for *Ascl1* into the mouse cerebral cortex. In sharp contrast to the very efficient  
36 reprogramming *in vitro*, *Ascl1*-transduced glial cells were converted into doublecortin-  
37 immunoreactive neurons only with low efficiency *in vivo*. Interfering with the phosphorylation of  
38 *Ascl1* by mutation of six conserved proline-directed serine/threonine phosphorylation sites  
39 (*Ascl1SA6*) has been previously shown to increase its neurogenic activity in the early embryonic  
40 cerebral cortex. We therefore tested whether transduction of proliferative glia with a retrovirus  
41 encoding *Ascl1SA6* improved their conversion into neurons. While *in vitro* glia-to-neuron  
42 conversion was markedly enhanced, *in vivo* reprogramming efficiency remained low. However, both  
43 wild-type and mutant *Ascl1* reduced the relative number of cells expressing the astrocytic marker  
44 glial fibrillary acidic protein (GFAP) and increased the relative number of cells expressing the  
45 oligodendroglial marker *Sox10* *in vivo*. Together, our results indicate that the enhanced neurogenic  
46 response of proliferative postnatal glia to *Ascl1SA6* versus *Ascl1* observed *in vitro* is not  
47 recapitulated *in vivo*.

## 48 INTRODUCTION

49 The postnatal mammalian brain is largely devoid of persistent neurogenesis, except from specialized  
50 niches such as the subependymal zone of the lateral ventricle and the subgranular zone of the dentate  
51 gyrus (Denoth-Lippuner and Jessberger, 2021). In all other brain regions, neurons lost due to disease  
52 or injury cannot be replaced, resulting in irreversible circuit dysfunction and functional impairments.  
53 Harnessing the neurogenic potential of glia to produce new neurons by direct lineage reprogramming  
54 has emerged as an approach for potential repair of diseased circuits in non-neurogenic brain areas  
55 such as the cerebral cortex (Peron and Berninger, 2015).

56 The basic helix-loop-helix (bHLH) transcription factor *Ascl1* directly transactivates target genes and  
57 thereby orchestrates multiple aspects of cortical development including cellular proliferation, cell  
58 cycle exit, and neural differentiation (Castro et al., 2011; Guillemot and Hassan, 2017). Notably,  
59 *Ascl1* controls GABAergic neurogenesis by regulating expression of homeobox genes of the distal-  
60 less gene family (*Dlx* genes) in progenitors of the ventral telencephalon (Casarosa et al., 1999;  
61 Poitras et al., 2007). We previously demonstrated that expression of *Ascl1* in mouse postnatal  
62 cortical astrocytes *in vitro* was sufficient to reprogram them into functional neurons endowed with  
63 GABAergic identity (Berninger et al., 2007; Heinrich et al., 2010). Remarkably, *Ascl1* can also  
64 reprogram cultured cells of human origin, including fibroblasts and pericytes, into neurons *in vitro*  
65 (Karow et al., 2012; Chanda et al., 2014). This raises the question whether it can also induce a  
66 neurogenic fate *in vivo*. For instance, it remains unknown whether glia of the cortical parenchyma  
67 can be reprogrammed into neurons *in vivo* with similar efficiency as *in vitro* when forced to express  
68 *Ascl1* during their proliferative expansion, which peaks around postnatal day 5 (Ge et al., 2012).

69 *Ascl1* function is tightly regulated by post-translational modifications, including phosphorylation  
70 (Dennis et al., 2019), which ultimately affects cell fate decisions. Notably, increased RAS/ERK  
71 signaling diverts *Ascl1* from its neurogenic role and promotes a proliferative glial program (Li et al.,  
72 2014). bHLH transcription factors share an evolutionarily conserved serine/threonine  
73 phosphorylation residue in the L-H2 junction of the bHLH domain (Quan et al., 2016), but also  
74 harbor unique phosphorylation sites outside of this domain (Guillemot and Hassan, 2017). Most  
75 notably, similar to other bHLH transcription factors (Oproescu et al., 2021), *Ascl1* is regulated by  
76 proline-directed serine threonine kinases, such as ERK (Li et al., 2014). Remarkably, preventing  
77 phosphorylation-dependent regulation of *Ascl1* activity by mutating all six serines of the conserved  
78 serine-proline (SP) phospho-sites to alanine, a mutation here referred to as *Ascl1SA6*, has been found

79 to increase its neurogenic activity in the embryonic day (E) 12.5 cerebral cortex (Li et al., 2014). This  
80 finding led us to hypothesize that using the Ascl1SA6 mutant variant could promote glia-to-neuron  
81 conversion both *in vitro* and *in vivo*.

82 Consistent with this hypothesis, our results show that Ascl1SA6 is more efficient than Ascl1 in  
83 converting postnatal cortical glia into neurons *in vitro*. However, Ascl1 and Ascl1SA6 had only  
84 limited reprogramming efficiency *in vivo*. Instead, we observed a reduction in the relative number of  
85 transduced cells expressing the astrocytic marker GFAP and a concomitant increase in the relative  
86 number of cells expressing the oligodendroglial lineage marker Sox10. This data suggests that,  
87 irrespective of its phosphorylation state, Ascl1 may preferentially promote an oligodendroglial  
88 fate in proliferative postnatal cortical glia *in vivo*.

89

## 90 **MATERIALS AND METHODS**

### 91 **Cell Culture**

92 Postnatal cortical astrocytes were isolated from cortices of C57Bl6/J mice between postnatal day 5-7  
93 days (P5-7), which were obtained from the Translational Animal Research Center of the University  
94 Medical Center Mainz. P5-P7 astrocytes were cultured as previously described (Heinrich et al., 2011;  
95 Sharif et al., 2021). Briefly, after isolation, cells were expanded for 7-10 days in Astromedium:  
96 Dulbecco's Modified Eagles Medium, Nutrient Mixture F12 (DMEM/F12, Gibco, 21331-020); 10%  
97 Fetal Bovine Serum (FBS, Invitrogen, 10270-106); 5% Horse Serum (Invitrogen, 16050-130); 1x  
98 Penicillin/Streptomycin (Invitrogen, 15140122); 1x L-GlutaMAX Supplement (Invitrogen, 35050-  
99 0380); 1x B27 Supplement (Invitrogen, 17504001); and supplemented with 10ng/ $\mu$ l Epidermal  
100 Growth Factor (EGF; Peptotech, AF-100-15) and 10 ng/ $\mu$ l basic-Fibroblast Growth Factor (FGF-2;  
101 Peptotech, 100-18B). Cells were incubated at 37°C in 5% CO<sub>2</sub>. When cells reached 70-80%  
102 confluency, cells were detached with 0.05% Trypsin EDTA (Life Technologies, 15400054) for 5 min  
103 at 37°C. Cells were subsequently seeded onto poly-D-lysine hydrobromide-coated (PDL; Sigma,  
104 P0899) glass coverslips (12mm, Menzel-Gläser, 631-0713) in 24-well plates at a density of 50000-  
105 80000 cells/well in 500  $\mu$ l Astromedium supplemented with 10 ng/ $\mu$ l EGF and 10 ng/ $\mu$ l FGF-2.

### 106 **Plasmids and retroviruses**

107 Moloney Murine Leukaemia Virus (MMLV)-based retroviral vectors (Heinrich et al., 2011) were  
108 used to express Ascl1 and Ascl1SA6 under control of the chicken  $\beta$ -actin promoter with a  
109 cytomegalovirus enhancer (pCAG). A GFP or DsRed reporter was cloned in behind an Internal  
110 Ribosome Entry Site (IRES). To generate the pCAG-Ascl1-IRES-DsRed/GFP and pCAG-Ascl1SA6-  
111 IRES-DsRed/GFP retroviral constructs, a cassette containing the coding sequences flanked by attL  
112 recombination sites was generated through the excision of the coding sequences for Ascl1 and  
113 Ascl1SA6 from the pCIG2 parental vectors (Li et al., 2014) via XhoI/SalI double restriction. Isolated  
114 fragments were inserted into the pENTRY1A Dual Selection (Invitrogen) intermediate vector  
115 linearized via SalI. The final retroviral constructs were subsequently obtained via recombination  
116 catalyzed by the LR Clonase II (Invitrogen, 11791020), which substituted the ccdB cassette in the  
117 destination vector pCAG-ccdB-IRES-DsRed or pCAG-ccdB-IRES-GFP with Ascl1 or Ascl1SA6  
118 coding sequences. Transduction with MMLV-based retroviral vectors encoding only the fluorescent  
119 protein GFP or DsRed behind an IRES under control of pCAG promoter (pCAG-IRES-  
120 DsRed/pCAG-IRES-GFP) (Heinrich et al., 2011) was used for control experiments. Viral particles

121 were produced using gpg helper free packaging cells to generate Vesicular Stomatitis Virus  
122 Glycoprotein (VSV-G)-pseudotyped retroviral particles (Ory et al., 1996). Viral stocks were titrated  
123 by transduction of HEK293 cultures. Viral titers used were in the range of  $10^7$  TU/ml.

## 124 **Retroviral transduction**

125 After seeding the cells and letting them attach for 4h in the incubator, cells were transduced with 1  $\mu$ l  
126 retrovirus/well and incubated at 37°C in 8% CO<sub>2</sub>. One day later, treated medium was removed and  
127 substituted with 500  $\mu$ l of B27 Differentiation Medium: DMEM/F12; 1x Penicillin/Streptomycin; 1x  
128 L-GlutaMAX Supplement; 1x B27 Supplement. Cells were treated again with 1  $\mu$ l/well of retrovirus.  
129 One day later, the culture volume was brought to 1 ml/well with fresh B27 Differentiation Medium.  
130 Cells were kept in culture for a total of 7 days *in vitro* before fixation for immunocytochemical  
131 analyses.

## 132 **Immunocytochemistry**

133 Cells were fixed with 4% paraformaldehyde (PFA, Sigma, P6148) for 10-15 min and washed 3 times  
134 with 1xPBS (Gibco, 70013-016) before storage at 4°C. Washed cells were first incubated for 1 h at  
135 room temperature (RT) with blocking solution (3% bovine serum albumin [BSA, Sigma, A7906] and  
136 0.5% Triton X-100 [Sigma, X100] in 1xPBS) and then with primary antibodies for 2-3 h at RT. After  
137 3 washes with 1xPBS, cells were incubated with secondary antibodies for 1h at RT. Cells were then  
138 counterstained with DAPI (Sigma, D8417) diluted 1:1000 in blocking solution, then washed 3 time in  
139 1xPBS before being mounted with Aqua Polymount (Polysciences, 18606-20). The following  
140 primary antibodies were used:  $\beta$ -Tubulin III (Mouse IgG2b, 1:1000, Sigma, T8660); Green  
141 Fluorescent Protein (GFP, Chicken, 1:300, AvesLab, GFP-1020); GFAP (rabbit, 1:1000, Dako,  
142 Z0334); Red Fluorescent Protein (RFP, rat, 1:400, Chromotek, 5F8). Secondary antibodies were  
143 diluted 1:1000 and were conjugated to: A488 anti-chicken (donkey, Jackson Immunoresearch, 703-  
144 545-155); Cy3 anti-mouse (goat, Dianova, 115-165-166); Cy3 anti-rat (goat, Dianova, 112-165-167);  
145 Cy5 anti-rabbit (goat, Dianova, 111-175-144).

## 146 **Animals and Animal Procedures**

147 The study was performed in accordance with the guidelines of the German Animal Welfare Act and  
148 the European Directive 2010/63/EU for the protection of animals used for scientific purposes and  
149 was approved by the Rhineland-Palatinate State Authority (permit number 23 177 07-G15-1-031).  
150 For retroviral injections, male and female C57Bl6/J pups kept with their mother were purchased from  
151 Janvier Labs. Mice were kept in a 12:12 h light-dark cycle in Polycarbonate Type II cages (350 cm<sup>2</sup>).  
152 Animals were provided with food and water *ad libitum* and all efforts were made to reduce the  
153 number of animals and their suffering. Before the surgery, animals received a subcutaneous injection  
154 of Carprofen (Rimadyl®, Zoetis, 4 mg/kg of body weight, in 0.9% NaCl [Amresco]). Anaesthesia  
155 was induced by intraperitoneal (i.p.) injection of a solution of 0.5 mg/kg Medetomidin (Pfizer), 5  
156 mg/kg Midazolam (Hameln) and 0.025 mg/kg Fentanyl (Albrecht) in 0.9% NaCl. Viruses were  
157 injected in the cerebral cortex using glass capillaries (Hirschmann, 9600105) pulled to obtain a 20  
158  $\mu$ m tip diameter. Briefly, a small incision was made on the skin with a surgical blade and the skull  
159 was carefully opened with a needle. Each pup received a volume of 0.5-1  $\mu$ l of retroviral suspension  
160 targeted to the somatosensory and visual cortical areas. After injection, the wound was closed with  
161 surgical glue (3M Vetbond, NC0304169) and anesthesia was terminated by i.p. injection of a solution  
162 of 2.5 mg/kg Atipamezol (Pfizer), 0.5 mg/kg Flumazenil (Hameln) and 0.1 mg/Kg Buprenorphin (RB

163 Pharmaceuticals) in 0.9% NaCl. Pups were left to recover on a warm plate (37°C) before returning  
164 them to their mother. Recovery state was checked daily for a week after the surgery.

## 165 **Tissue preparation and immunohistochemistry**

166 Animals were lethally anesthetized with a solution of 120 mg/kg Ketamine (Zoetis) and 16 mg/kg  
167 Xylazine (Bayer) (in 0.9% NaCl, i.p.) and transcardiacally perfused with pre-warmed 0.9% NaCl  
168 followed by ice-cold 4% paraformaldehyde (PFA, Sigma, P6148). The brains were harvested and  
169 post-fixed for 2 h to overnight in 4% PFA at 4°C. Then, 40 µm thick coronal sections were prepared  
170 using a vibratome (Microm HM650V, Thermo Scientific) and stored at -20°C in a cryoprotective  
171 solution (20% glucose [Sigma, G8270], 40% ethylene glycol [Sigma, 324558], 0.025% sodium azide  
172 [Sigma, S2202], in 0.5 X phosphate buffer [15mM Na<sub>2</sub>HPO<sub>4</sub>·12H<sub>2</sub>O [Merck, 10039-32-4]; 16mM  
173 NaH<sub>2</sub>PO<sub>4</sub>·2H<sub>2</sub>O [Merck, 13472-35-0]; pH 7.4]).

174 For immunohistochemistry, brain sections were washed three times for 15 min with 1X TBS (50mM  
175 Tris [Invitrogen, 15504-020]; 150 mM NaCl [Amresco, 0241]; pH7.6) and then incubated for 1.5 h in  
176 blocking solution: 5% Donkey Serum (Sigma, S30); 0.3% Triton X-100; 1X TBS. Slices were then  
177 incubated with primary antibodies diluted in blocking solution for 2-3 h at RT, followed by an  
178 overnight incubation at 4°C. After three washing steps with 1X TBS, slices were incubated with  
179 secondary antibodies diluted blocking solution for 1 h at RT. Slices were washed twice with 1X TBS,  
180 incubated with DAPI dissolved in 1X TBS for 5 min at RT and washed three times with 1X TBS. For  
181 mounting, slices were washed two times with 1X Phosphate Buffer (30 mM Na<sub>2</sub>HPO<sub>4</sub>·12H<sub>2</sub>O  
182 [Merck, 10039-32-4]; 33 mM NaH<sub>2</sub>PO<sub>4</sub>·2H<sub>2</sub>O [Merck, 13472-35-0]; pH 7.4) and were dried on  
183 Superfrost (Thermo Fisher Scientific) microscope slides. Sections were further dehydrated with  
184 toluene and covered with cover-glasses mounted with DPX mountant for histology (Sigma, 06522) or  
185 directly mounted with Prolong<sup>TM</sup>Gold (Invitrogen, P36930). The following primary antibodies were  
186 used: Achaete scute-like1 (Ascl1, mouse IgG1, 1:400, BD Pharmingen, 556604); Doublecortin  
187 (DCX, goat, 1:250, Santa Cruz Biotechnology, sc-8066); Green Fluorescent Protein (GFP, chicken,  
188 1:1000, AvesLab, GFP-1020); Glial Fibrillary Acidic Protein (GFAP, rabbit, 1:300, Dako, Z0334);  
189 Ionized calcium-binding adapter molecule 1 (Iba1, rabbit, 1:800, Wako, 16A11); mCherry (chicken,  
190 1:300, EnCor Biotechnology, CPCA-mCherry); Red Fluorescent Protein (RFP, rabbit, 1:500,  
191 Biomol, 600401379S); SRY-Box 10 (Sox10, goat, 1:100, Santa Cruz Biotechnology, sc-17342).  
192 Secondary antibodies were made in donkey and conjugated with: A488 (anti-chicken, 1:200, Jackson  
193 Immunoresearch, 703-545-155); A488 (anti-rabbit, 1:200, Invitrogen, A21206); A647 (anti-rabbit,  
194 1:500, Invitrogen, A31573); A488 (anti-mouse, 1:200, Invitrogen, A21202); A647 (anti-mouse,  
195 1:500, Invitrogen, A31571); Cy3 (anti-chicken, 1:500, Dianova, 703-165-155); Cy3 (anti-goat,  
196 1:500, Dianova, 705-165-147); Cy3 (anti-mouse, 1:500, Invitrogen, A10037); Cy3 (anti-rabbit,  
197 1:500, Dianova, 711-165-152); Cy5 (anti-goat, 1:500, Dianova, 705-175-147).

## 198 **Imaging and data analysis**

199 Images were acquired using a TCS SP5 (Leica) confocal microscope (Institute of Molecular Biology,  
200 Mainz, Germany) equipped with four PMTs, four lasers (405 Diode, Argon, HeNe 543, HeNe 633)  
201 and a fast-resonant scanner. Images were taken with a 20x dry objective (NA 0.7) or a 40x oil  
202 objective (NA 1.3). For imaging of brain sections, serial Z-stacks spaced at 0.3 µm-1.25 µm distance  
203 were acquired to image the whole thickness of the section. Alternatively, imaging was performed  
204 using an Axio Imager.M2 fluorescent microscope equipped with an ApoTome (Zeiss) at a 20x dry  
205 objective (NA 0.7) or a 63x oil objective (NA 1.25).

206 For *in vitro* experiments, biological replicates (n) were obtained from independent cultures prepared  
207 from different animals. For each n, the value corresponds to the mean value of two technical  
208 replicates (i.e., two coverslips). Cell quantifications were performed on 4x4 tile scans (individual tile  
209 size: 624,70x501,22  $\mu\text{m}$ ). For *in vivo* experiments, n corresponds to the number of animals.  
210 Quantifications were performed on equally spaced sections (240 or 480  $\mu\text{m}$ ) covering the whole area  
211 with transduced cells. Tile scans were acquired with a serial Z-stack spaced at 1.25  $\mu\text{m}$  distance.

212 For images used for illustration, the color balance of each channel was uniformly adjusted in  
213 Photoshop (Adobe). If necessary, Lookup Tables were changed to maintain uniformity of color  
214 coding within figures. When appropriate, a median filter (despeckle) was applied in Fiji to pictures  
215 presenting salt-and-pepper noise, and noise was filtered via removal of outlier pixels.

216 Multiple sequence alignment of the *Ascl1* and *Ascl1SA6* protein sequences was performed in Clustal  
217 Omega (RRID:SCR\_001591).

## 218 **Statistical analysis**

219 The number of independent experiments (n) and number of cells analyzed are reported in the main  
220 text or figure legends. Data are represented as means  $\pm$  SD. Statistical analysis was performed in  
221 SPSS Statistics 23 V5 (IBM). Normality of distribution was assessed using Shapiro-Wilk test and the  
222 significance of the differences between groups was analyzed by One-Way ANOVA followed by  
223 Bonferroni post-hoc test. P-values are indicated in the figures or figure legends. Graphs were  
224 prepared in GraphPad Prism 5.

225

## 226 **RESULTS**

### 227 ***Ascl1SA6* improves neuronal reprogramming efficiency from cultured postnatal cortical** 228 **astroglia compared to wild-type *Ascl1***

229 Our earlier work showed that *Ascl1* can reprogram cultured postnatal astroglia into neurons  
230 (Berninger et al., 2007; Heinrich et al., 2010). More recently, overexpression of *Ascl1SA6* in  
231 embryonic cortical progenitors was found to enhance neuronal differentiation compared with wild-  
232 type *Ascl1* (Li et al., 2014). Here, we examined whether *Ascl1SA6* can increase the glia-to-neuron  
233 reprogramming capacity of *Ascl1* in postnatal astroglial cultures. For this purpose, we first cloned  
234 murine *Ascl1* and *Ascl1SA6* sequences into retroviral vectors for transduction of proliferative glia.  
235 Figure 1A depicts the six serine-to-alanine (SA6) substitutions resulting from the targeted mutation  
236 of the *Ascl1* coding sequence. Astroglial cultures prepared from P5 mice were transduced with  
237 retroviruses encoding for *Ascl1* or *Ascl1SA6* together with a reporter gene (GFP or DsRed). A  
238 retrovirus encoding only a reporter gene was used as control (Figure 1B). Neuronal reprogramming  
239 efficiency was evaluated seven days after transduction by immunocytochemistry directed against the  
240 neuronal marker  $\beta$ -Tubulin III. After transduction with control virus, virtually no  $\beta$ -Tubulin III-  
241 immunoreactive cells were found ( $0.1 \pm 0.2\%$ , 1398 transduced cells analysed, n=3 biological  
242 replicates; Figure 1C,D). In contrast, consistent with our previous findings (Berninger et al., 2007;  
243 Heinrich et al., 2010), astrocytes transduced with *Ascl1* acquired a neuronal-like elongated  
244 morphology and expressed  $\beta$ -Tubulin III ( $27.3 \pm 3.8\%$ , 3061 transduced cells analysed, n=4 biological  
245 replicates; Figure 1C,D). Strikingly, the proportion of converted cells doubled upon overexpression  
246 of *Ascl1SA6* ( $51.1 \pm 7.0\%$ , 3462 transduced cells analysed, n=3 biological replicates; Figure 1C,D).

247 These results indicate an increased neurogenic potential of *Ascl1SA6* in glia-to-neuron conversion  
248 when expressed in postnatal astrocytes *in vitro*.

### 249 ***Ascl1* or *Ascl1SA6* converts postnatal cortical glia into neurons with low efficiency *in vivo***

250 We next tested whether, like *in vitro*, proliferative cortical glia can be efficiently reprogrammed  
251 towards a neuronal fate *in vivo*. Cortical glia greatly expands during the first postnatal week by local  
252 proliferation (Ge et al., 2012; Clavreul et al., 2019). To target proliferative glia, retroviruses were  
253 injected into the cerebral cortex at postnatal day five (P5). We then analyzed the identity of the  
254 transduced cells by immunohistochemical analysis at three days post injection (3 dpi), first with the  
255 control virus only (Figure 2A). We found that virtually all transduced cells were immunopositive for  
256 glial markers (Figure 2B). The majority of transduced cells were immunoreactive for the astroglial  
257 marker GFAP ( $62.8 \pm 8.1\%$ , 753 transduced cells analysed,  $n=3$  mice; Figure 2B,C), and the  
258 remaining were oligodendroglial cells immunoreactive for Sox10 ( $32.3 \pm 6.1\%$ , 753 transduced cells  
259 analysed,  $n=3$  mice; Figure 2B,C). Rarely, we found transduced cells immunoreactive for the  
260 microglial marker Iba1 ( $1.0 \pm 0.9\%$ , 578 transduced cells analysed,  $n=3$  mice; Figure 2B,D).  
261 Importantly, none of the control-transduced cell expressed the immature neuronal marker DCX  
262 ( $0.0 \pm 0.0\%$ , 578 transduced cells analysed,  $n=3$  mice; Figure 2B,D). These results indicate that  
263 retroviruses injected in the P5 mouse cerebral cortex *in vivo* specifically transduce astroglial and  
264 oligodendroglial lineage cells.

265 We next injected control, *Ascl1*- or *Ascl1SA6*-encoding retroviruses and investigated whether these  
266 bHLH genes could reprogram P5 proliferative glia into neurons by immunohistochemical analysis at  
267 12 dpi. *Ascl1* was effectively expressed in cells transduced with *Ascl1* and *Ascl1SA6*, while absent  
268 from control-transduced cells (Figure 3A). Control-transduced cells lacked DCX expression  
269 ( $0.0 \pm 0.0\%$ , 2157 transduced cells analysed,  $n=3$  mice; Figure 3B,C), confirming that the control  
270 vector did not induce a cell fate switch. In contrast to our findings *in vitro*, *Ascl1*- and *Ascl1SA6*-  
271 transduced cells largely remained immunonegative for DCX (Figure 3B), with only a small number  
272 of cells exhibiting an immature neuron-like morphology and expressing DCX (*Ascl1*:  $4.6 \pm 1.6\%$ , 720  
273 transduced cells analysed,  $n=3$  mice, and *Ascl1SA6*:  $6.9 \pm 0.2\%$ , 409 transduced cells analysed,  $n=3$   
274 mice) (Figure 3B,C). Together, our results indicate that despite the strong neurogenic potential of  
275 *Ascl1* and *Ascl1SA6* *in vitro* (Figure 2), these bHLH genes can only reprogram postnatal cortical glia  
276 into neurons with low efficiency *in vivo*.

### 277 ***Ascl1* expression in postnatal cortical glia increases the relative number of cells expressing 278 oligodendroglial markers**

279 Given that only a few *Ascl1* or *Ascl1SA6* transduced cells were converted into neurons, we  
280 examined whether the remaining cells nevertheless had responded to the reprogramming factors and  
281 downregulated glial markers. We therefore analyzed the expression of the pan-oligodendroglial  
282 marker Sox10 and the astroglial marker GFAP in *Ascl1*- and *Ascl1SA6*-transduced cells (Figure 4A-  
283 C). Consistent with our analysis at 3 dpi (Figure 2), control-transduced cells at 12 dpi were glial cells,  
284 predominantly astrocytes, with two thirds of the cells expressing GFAP ( $63.3 \pm 11.3\%$ , 1885  
285 transduced cells analysed,  $n=3$  mice) and another third expressing Sox10 ( $35.6 \pm 12.1\%$ , 1885  
286 transduced cells analysed,  $n=3$  mice; Figure 4A,C). As expected, the expression of GFAP and Sox10  
287 was mutually exclusive in control-transduced cells ( $0.3 \pm 0.6\%$  of GFAP/Sox10-positive cells, 1885  
288 transduced cells analysed,  $n=3$  mice; Figure 4B,C and Supplementary Movie 1). Following  
289 transduction with both *Ascl1* variants, we observed a marked alteration in the expression of glial  
290 markers. Strikingly, only one fifth of transduced cells expressed exclusively GFAP (*Ascl1*,

291 18.7±3.1%, 848 transduced cells analysed, n=4 mice; Ascl1SA6, 20.4±6.1%, 573 transduced cells  
292 analysed, n=3 mice). Interestingly, in Ascl1-transduced cells, the reduction in GFAP expression was  
293 concomitant with a large increase in the relative number of Sox10-only expressing cells (70.0±7.7%,  
294 848 transduced cells analysed, n=4 mice; Figure 4C). The same trend was observed following  
295 Ascl1SA6 overexpression (50.7±3.1%, 573 transduced cells analysed, n=3 mice; Figure 4C), albeit  
296 without reaching statistical significance. Instead, a significant increase in the relative number of cells  
297 co-expressing Sox10 and GFAP was observed in Ascl1SA6-transduced cells (Figure 4B,C and  
298 Supplementary Movie 3). The detection of GFAP/Sox10-immunopositive cells following  
299 transduction with both Ascl1 variants (Ascl1, 4.5±2.6%, 848 transduced cells analysed, n=4 mice;  
300 Ascl1SA6, 17.1±6.0%, 573 transduced cells analysed, n=3 mice, Figure 4B,C and Supplementary  
301 Movies 2 and 3) may capture cells in a “mixed” glial state. These results indicate that although  
302 largely failing to redirect towards neurogenesis, proliferative glial cells appear to be responsive to  
303 Ascl1 or Ascl1SA6 by turning on Sox10 expression.

## 304 **DISCUSSION**

305 In the present study, we assessed potential reprogramming of glia during their proliferative expansion  
306 in the early postnatal cerebral cortex by overexpression of either wild-type Ascl1 or a mutant variant,  
307 in which the six conserved serine-proline motifs located outside of the bHLH domain had been  
308 mutated (Ascl1SA6), thereby rendering Ascl1 unresponsive to regulation by phosphorylation (Li et  
309 al., 2014). We provide evidence that Ascl1SA6 is more efficient than wild-type Ascl1 in converting  
310 postnatal astroglia into neurons *in vitro*. Furthermore, we show that the reprogramming efficiency of  
311 both Ascl1 and Ascl1SA6 *in vivo* is surprisingly low in the early postnatal cortex compared to the  
312 results obtained *in vitro*. Interestingly, while only few Ascl1-transduced cells converted into neurons,  
313 we observed a relative shift from GFAP-positive cells to Sox10-positive cells, suggesting an increase  
314 in the number of cells of the oligodendroglial lineage at the expense of astroglia.

315 Our results indicate that Ascl1 reprograms proliferative postnatal cortical glia into neurons with low  
316 efficiency *in vivo*. This is in agreement with previous studies reporting inefficient neuronal  
317 reprogramming following retrovirus- or lentivirus-mediated expression of Ascl1 in reactive glia in  
318 the adult lesioned cortex (Heinrich et al., 2014), adult striatum (Niu et al., 2015) and adult lesioned  
319 spinal cord (Su et al., 2014). In contrast to these findings, another study reported very efficient  
320 reprogramming of glia into mature neurons following adeno-associated virus (AAV)-mediated  
321 expression of Ascl1 in the dorsal midbrain, striatum and somatosensory cortex (Liu et al., 2015).  
322 However, misidentification of endogenous neurons as glia-derived neurons was recently reported  
323 following AAV-mediated expression of Neurod1, possibly due to transgene sequence-specific effects  
324 *in cis* (Wang et al., 2021). Thus, one possible explanation for the apparent discrepancy with regard to  
325 the efficiency of Ascl1 to induce reprogramming *in vivo* is that AAV-mediated expression of Ascl1,  
326 similarly to Neurod1, resulted in labelling of endogenous neurons. Future studies combining AAV-  
327 mediated expression of reprogramming factors such as Ascl1 with genetic lineage tracing are  
328 required to clarify the origin of seemingly induced neurons (Wang et al., 2021; Leaman et al., 2022).

329 The apparent difference in reprogramming potency of Ascl1 *in vitro* and *in vivo* could be attributed to  
330 various factors. 1) Enhanced intrinsic cell plasticity of cultured astrocytes as compared to astrocytes  
331 *in vivo* despite both being in a similar proliferative state. The protocol employed here to culture and  
332 reprogram astrocytes may enhance their competence to undergo cell fate conversion. Indeed, a  
333 previous study showed that allowing these astrocytes to mature *in vitro* even only for few days prior  
334 to proneural factor activation resulted in a drastic decrease in reprogramming rate, an effect that  
335 could be attributed to activation of the REST/coREST repressor complex and accompanying



336 epigenetic maturation (Masserdotti et al., 2015). *In vivo*, REST/coREST complex activity may be  
337 already higher, thereby safeguarding glial identity against Ascl1-induced neurogenic reprogramming.  
338 2) Another important difference obviously consists in considerably more complex local environment  
339 in which these glial cells find themselves *in vivo*. Nearly nothing is known about the influence that  
340 other cell types exert on cells that successfully undergo reprogramming or fail to do so *in vivo*.  
341 However, *in vitro* studies have shown that human pericytes undergoing reprogramming by Ascl1 and  
342 Sox2 pass through a neural stem cell-like stage during which they become responsive to several  
343 intercellular signaling pathways including Notch signaling (Karow et al., 2018). Thus, it is  
344 conceivable that signaling molecules as well as extracellular matrix components secreted by cells  
345 within the local environment could impinge on early and perhaps more vulnerable reprogramming  
346 stages, thereby curtailing progression towards neurogenesis.

347 Our retroviral vectors were found to target proliferative cells of both the astroglial and  
348 oligodendroglial lineage. The overall very low conversion efficiency suggests that not only astroglia,  
349 but also cells of the oligodendroglial lineage possess effective safeguarding mechanisms that protect  
350 against acquiring a neurogenic fate. In fact, these safeguarding mechanisms are effective even when  
351 confronted with a powerful transcription factor with pioneer factor activity, such as Ascl1 (Wapinski  
352 et al., 2013; Raposo et al., 2015; Park et al., 2017) or a mutant variant with even increased  
353 neurogenic capacity (Woods et al., 2022). Thus, despite being in a proliferative state, astroglia and  
354 oligodendrocyte progenitor cells could be potentially less plastic than their adult reactive counterparts  
355 in the injured adult brain (Sirko et al., 2013; Magnusson et al., 2014; Faiz et al., 2015; Nato et al.,  
356 2015).

357 While Ascl1 did not induce neurogenic conversion in cells of the astroglial and oligodendroglial  
358 lineages, we observed a significant shift in the ratio of virus-transduced astroglial to oligodendroglial  
359 cells. Intriguingly, the same shift was observed when using the more neurogenic mutant Ascl1SA6.  
360 Several mechanisms could account for that: enhanced expansion of the oligodendroglial cells by  
361 activating Ascl1-mediated proliferative programs (Castro et al., 2011); conversely, enhanced cell  
362 cycle exit of astrocytes expressing Ascl1; enhanced or reduced survival of oligodendroglial or  
363 astroglial lineage cells, respectively; finally, conversion of astroglial cells towards an  
364 oligodendroglial fate. The latter would be consistent with the fact that Ascl1 is known to contribute  
365 to oligodendroglialogenesis in the developing and adult brain (Parras et al., 2004; Parras et al., 2007).  
366 Moreover, studies in the adult hippocampus have previously shown that similar retroviral expression  
367 of Ascl1 in neural stem cells, contrary to expectation, promoted oligodendroglialogenesis instead of  
368 GABAergic neurogenesis (Jessberger et al., 2008; Braun et al., 2015). Intriguingly, if this latter  
369 scenario is indeed the case, the fact that Ascl1SA6 caused a similar shift as wildtype Ascl1 seems to  
370 preclude an interpretation according to which acquisition of an oligodendroglial fate would require  
371 Ascl1 to be phosphorylated. One line of evidence arguing for at least some oligodendroglial  
372 reprogramming by Ascl1 consists in the fact that both variants caused the emergence of GFAP and  
373 Sox10 double-positive cells, which were not observed in control virus transduced brains, potentially  
374 hinting at an intermediate state between the two glial lineages. Be that as it may, future studies will  
375 be needed to distinguish between the mutually non-exclusive mechanisms of action delineated here.

376 In sum, our study reveals that proliferative glia in the healthy postnatal cerebral cortex are  
377 safeguarded against potential neurogenic fate conversion induced by pioneer transcription factors  
378 such as Ascl1. Further work will be needed to assess whether additional factors synergizing with  
379 Ascl1, such as Sox2 (Heinrich et al., 2014), Dxl2 (Lentini et al., 2021) or Bcl2 (Gascon et al., 2016)  
380 could help overcoming these potent safeguarding mechanisms *in vivo*.

381

382

### 383 **FIGURE LEGENDS**

384 **Figure 1.** Ascl1SA6 induces more efficient glia-to-neuron reprogramming *in vitro*. **(A)** Multiple  
385 sequence alignment depicts the 6 serine residues mutated in the sequence of mouse Ascl1 (mAscl1)  
386 to generate the mutant Ascl1SA6. **(B)** Experimental scheme. Postnatal day 5 (P5) cortical astrocytes  
387 cultures were transduced with pCAG-Ascl1-IRES-DsRed/GFP or pCAG-Ascl1SA6-IRES-  
388 DsRed/GFP retroviral constructs, or pCAG-IRES-DsRed/pCAG-IRES-GFP as a control. Seven days  
389 later, cells were fixed for immunocytochemical (ICC) analysis. **(C)** Representative pictures of the  
390 cultures transduced with control, Ascl1 or Ascl1SA6-encoding retroviruses. In control, transduced  
391 cells (in red) exhibit an astroglia-like morphology, express GFAP (in grey) and lack  $\beta$ -Tubulin III (in  
392 green) expression. Conversely, Ascl1- and Ascl1SA6-transduced cells develop neuronal  
393 morphological hallmarks and acquire  $\beta$ -Tubulin III expression. **(D)** Quantification of the percentage  
394 of transduced cells expressing  $\beta$ -Tubulin III indicates higher reprogramming efficiency with  
395 Ascl1SA6. AM, Astromedium; dpt, days post-transduction; ICC, immunocytochemistry; P,  
396 postnatal day.

397 **Figure 2.** Retroviruses injected in the postnatal cerebral cortex specifically transduce glial cells. **(A)**  
398 Experimental scheme. A control retrovirus pCAG-IRES-DsRed was injected in the cerebral cortex of  
399 P5 mice and immunohistochemical analysis was performed 3 days later. **(B)** Pie chart showing the  
400 relative number of oligodendroglial (Sox10-positive), astroglial (GFAP-positive), microglial (Iba1-  
401 positive) and neuronal (DCX-positive) cells among transduced cells. **(C)** Confocal images depicting  
402 control-transduced cells (in red) co-expressing GFAP (in green, arrowheads, upper insets) or Sox10  
403 (in blue, arrows, lower insets). **(D)** Confocal images depicting control-transduced cell (in red) co-  
404 expressing Iba1 (in cyan, left panel). No control-transduced cells expressing DCX were found (in  
405 cyan, right panel). Full arrows/arrowheads indicate marker-positive cells; empty arrows/arrowheads  
406 indicate marker-negative cells. IHC, immunohistochemistry; RV, retrovirus.

407 **Figure 3.** Ascl1 and Ascl1SA6 convert postnatal glia into neurons with low efficiency *in vivo*. **(A)**  
408 Immunohistochemistry confirmed the absence of Ascl1 in control-transduced postnatal cortical glia  
409 and efficient Ascl1 induction by pCAG-Ascl1-IRES-DsRed/GFP and pCAG-Ascl1SA6-IRES-  
410 DsRed/GFP retroviruses. **(B)** Confocal images depicting the maintenance of a glial morphology and  
411 lack of DCX induction in most transduced cells with only a few transduced cells acquiring a neuronal  
412 morphology and expressing DCX following transduction with Ascl1 and Ascl1SA6. **(C)**  
413 Quantification of the percentage of transduced cells expressing DCX at 12dpi indicates that Ascl1  
414 and Ascl1SA6 induce neurogenesis from postnatal cortical glia with low efficiency. Full  
415 arrows/arrowheads indicate marker-positive cells; empty arrows/arrowheads indicate marker-  
416 negative cells. Dpi, days post infection.

417 **Figure 4.** Ascl1 and Ascl1SA6 induce an increase in the number of cells expressing oligodendroglial  
418 markers. **(A)** Confocal images depicting control-, Ascl1- and Ascl1SA6-transduced cells (in red)  
419 expressing either GFAP (in green, arrowheads) or Sox10 (in cyan, arrows). **(B)** Confocal images  
420 depicting Ascl1- and Ascl1SA6-transduced cells (in red) co-expressing (cyan arrows) GFAP (in  
421 green) and Sox10 (in cyan). In control, the expression of GFAP (in green, arrowheads) and Sox10 (in  
422 cyan, arrows) was exclusive. **(C)** Quantification of the percentage of transduced cells expressing  
423 GFAP, Sox10 or both at 12dpi indicates a concomitant reduction in the relative number of cells  
424 expressing an astroglial marker and increase in the relative number of cells expressing an

425 oligodendroglial marker upon transduction with either Ascl1 variant. Full arrows/arrowheads indicate  
426 marker-positive cells; empty arrows/arrowheads indicate marker-negative cells.

427

## 428 REFERENCES

- 429 Berninger, B., Costa, M.R., Koch, U., Schroeder, T., Sutor, B., Grothe, B., et al. (2007). Functional  
430 properties of neurons derived from in vitro reprogrammed postnatal astroglia. *J Neurosci*  
431 27(32), 8654-8664. doi: 10.1523/JNEUROSCI.1615-07.2007.
- 432 Braun, S.M., Pilz, G.A., Machado, R.A., Moss, J., Becher, B., Toni, N., et al. (2015). Programming  
433 Hippocampal Neural Stem/Progenitor Cells into Oligodendrocytes Enhances Remyelination  
434 in the Adult Brain after Injury. *Cell Rep* 11(11), 1679-1685. doi:  
435 10.1016/j.celrep.2015.05.024.
- 436 Casarosa, S., Fode, C., and Guillemot, F. (1999). Mash1 regulates neurogenesis in the ventral  
437 telencephalon. *Development* 126(3), 525-534.
- 438 Castro, D.S., Martynoga, B., Parras, C., Ramesh, V., Pacary, E., Johnston, C., et al. (2011). A novel  
439 function of the proneural factor Ascl1 in progenitor proliferation identified by genome-wide  
440 characterization of its targets. *Genes Dev* 25(9), 930-945. doi: 10.1101/gad.627811.
- 441 Chanda, S., Ang, C.E., Davila, J., Pak, C., Mall, M., Lee, Q.Y., et al. (2014). Generation of induced  
442 neuronal cells by the single reprogramming factor ASCL1. *Stem Cell Reports* 3(2), 282-296.  
443 doi: 10.1016/j.stemcr.2014.05.020.
- 444 Clavreul, S., Abdeladim, L., Hernandez-Garzon, E., Niculescu, D., Durand, J., Ieng, S.H., et al.  
445 (2019). Cortical astrocytes develop in a plastic manner at both clonal and cellular levels. *Nat*  
446 *Commun* 10(1), 4884. doi: 10.1038/s41467-019-12791-5.
- 447 Dennis, D.J., Han, S., and Schuurmans, C. (2019). bHLH transcription factors in neural development,  
448 disease, and reprogramming. *Brain Res* 1705, 48-65. doi: 10.1016/j.brainres.2018.03.013.
- 449 Denoth-Lippuner, A., and Jessberger, S. (2021). Formation and integration of new neurons in the  
450 adult hippocampus. *Nat Rev Neurosci* 22(4), 223-236. doi: 10.1038/s41583-021-00433-z.
- 451 Faiz, M., Sachewsky, N., Gascon, S., Bang, K.W., Morshead, C.M., and Nagy, A. (2015). Adult  
452 Neural Stem Cells from the Subventricular Zone Give Rise to Reactive Astrocytes in the  
453 Cortex after Stroke. *Cell Stem Cell* 17(5), 624-634. doi: 10.1016/j.stem.2015.08.002.
- 454 Gascon, S., Murenu, E., Masserdotti, G., Ortega, F., Russo, G.L., Petrik, D., et al. (2016).  
455 Identification and Successful Negotiation of a Metabolic Checkpoint in Direct Neuronal  
456 Reprogramming. *Cell Stem Cell* 18(3), 396-409. doi: 10.1016/j.stem.2015.12.003.
- 457 Ge, W.P., Miyawaki, A., Gage, F.H., Jan, Y.N., and Jan, L.Y. (2012). Local generation of glia is a  
458 major astrocyte source in postnatal cortex. *Nature* 484(7394), 376-380. doi:  
459 10.1038/nature10959.
- 460 Guillemot, F., and Hassan, B.A. (2017). Beyond proneural: emerging functions and regulations of  
461 proneural proteins. *Curr Opin Neurobiol* 42, 93-101. doi: 10.1016/j.conb.2016.11.011.
- 462 Heinrich, C., Bergami, M., Gascon, S., Lepier, A., Vigano, F., Dimou, L., et al. (2014). Sox2-  
463 mediated conversion of NG2 glia into induced neurons in the injured adult cerebral cortex.  
464 *Stem Cell Reports* 3(6), 1000-1014. doi: 10.1016/j.stemcr.2014.10.007.

- 465 Heinrich, C., Blum, R., Gascon, S., Masserdotti, G., Tripathi, P., Sanchez, R., et al. (2010). Directing  
466 astroglia from the cerebral cortex into subtype specific functional neurons. *PLoS Biol* 8(5),  
467 e1000373. doi: 10.1371/journal.pbio.1000373.
- 468 Heinrich, C., Gascon, S., Masserdotti, G., Lepier, A., Sanchez, R., Simon-Ebert, T., et al. (2011).  
469 Generation of subtype-specific neurons from postnatal astroglia of the mouse cerebral cortex.  
470 *Nat Protoc* 6(2), 214-228. doi: 10.1038/nprot.2010.188.
- 471 Jessberger, S., Toni, N., Clemenson, G.D., Jr., Ray, J., and Gage, F.H. (2008). Directed  
472 differentiation of hippocampal stem/progenitor cells in the adult brain. *Nat Neurosci* 11(8),  
473 888-893. doi: 10.1038/nn.2148.
- 474 Karow, M., Camp, J.G., Falk, S., Gerber, T., Pataskar, A., Gac-Santel, M., et al. (2018). Direct  
475 pericyte-to-neuron reprogramming via unfolding of a neural stem cell-like program. *Nat*  
476 *Neurosci* 21(7), 932-940. doi: 10.1038/s41593-018-0168-3.
- 477 Karow, M., Sanchez, R., Schichor, C., Masserdotti, G., Ortega, F., Heinrich, C., et al. (2012).  
478 Reprogramming of pericyte-derived cells of the adult human brain into induced neuronal  
479 cells. *Cell Stem Cell* 11(4), 471-476. doi: 10.1016/j.stem.2012.07.007.
- 480 Leaman, S., Marichal, N., and Berninger, B. (2022). Reprogramming cellular identity in vivo.  
481 *Development* 149(4). doi: 10.1242/dev.200433.
- 482 Lentini, C., d'Orange, M., Marichal, N., Trottmann, M.M., Vignoles, R., Foucault, L., et al. (2021).  
483 Reprogramming reactive glia into interneurons reduces chronic seizure activity in a mouse  
484 model of mesial temporal lobe epilepsy. *Cell Stem Cell* 28(12), 2104-2121 e2110. doi:  
485 10.1016/j.stem.2021.09.002.
- 486 Li, S., Mattar, P., Dixit, R., Lawn, S.O., Wilkinson, G., Kinch, C., et al. (2014). RAS/ERK signaling  
487 controls proneural genetic programs in cortical development and gliomagenesis. *J Neurosci*  
488 34(6), 2169-2190. doi: 10.1523/JNEUROSCI.4077-13.2014.
- 489 Liu, Y., Miao, Q., Yuan, J., Han, S., Zhang, P., Li, S., et al. (2015). *Ascl1* Converts Dorsal Midbrain  
490 Astrocytes into Functional Neurons In Vivo. *J Neurosci* 35(25), 9336-9355. doi:  
491 10.1523/JNEUROSCI.3975-14.2015.
- 492 Magnusson, J.P., Goritz, C., Tatarishvili, J., Dias, D.O., Smith, E.M., Lindvall, O., et al. (2014). A  
493 latent neurogenic program in astrocytes regulated by Notch signaling in the mouse. *Science*  
494 346(6206), 237-241. doi: 10.1126/science.346.6206.237.
- 495 Masserdotti, G., Gillotin, S., Sutor, B., Drechsel, D., Irmeler, M., Jorgensen, H.F., et al. (2015).  
496 Transcriptional Mechanisms of Proneural Factors and REST in Regulating Neuronal  
497 Reprogramming of Astrocytes. *Cell Stem Cell* 17(1), 74-88. doi: 10.1016/j.stem.2015.05.014.
- 498 Nato, G., Caramello, A., Trova, S., Avataneo, V., Rolando, C., Taylor, V., et al. (2015). Striatal  
499 astrocytes produce neuroblasts in an excitotoxic model of Huntington's disease. *Development*  
500 142(5), 840-845. doi: 10.1242/dev.116657.
- 501 Niu, W., Zang, T., Smith, D.K., Vue, T.Y., Zou, Y., Bachoo, R., et al. (2015). SOX2 reprograms  
502 resident astrocytes into neural progenitors in the adult brain. *Stem Cell Reports* 4(5), 780-794.  
503 doi: 10.1016/j.stemcr.2015.03.006.
- 504 Oproescu, A.M., Han, S., and Schuurmans, C. (2021). New Insights Into the Intricacies of Proneural  
505 Gene Regulation in the Embryonic and Adult Cerebral Cortex. *Front Mol Neurosci* 14,  
506 642016. doi: 10.3389/fnmol.2021.642016.

- 507 Ory, D.S., Neugeboren, B.A., and Mulligan, R.C. (1996). A stable human-derived packaging cell line  
508 for production of high titer retrovirus/vesicular stomatitis virus G pseudotypes. *Proc Natl*  
509 *Acad Sci U S A* 93(21), 11400-11406. doi: 10.1073/pnas.93.21.11400.
- 510 Park, N.I., Guilhamon, P., Desai, K., McAdam, R.F., Langille, E., O'Connor, M., et al. (2017).  
511 ASCL1 Reorganizes Chromatin to Direct Neuronal Fate and Suppress Tumorigenicity of  
512 Glioblastoma Stem Cells. *Cell Stem Cell* 21(3), 411. doi: 10.1016/j.stem.2017.08.008.
- 513 Parras, C.M., Galli, R., Britz, O., Soares, S., Galichet, C., Battiste, J., et al. (2004). Mash1 specifies  
514 neurons and oligodendrocytes in the postnatal brain. *EMBO J* 23(22), 4495-4505. doi:  
515 10.1038/sj.emboj.7600447.
- 516 Parras, C.M., Hunt, C., Sugimori, M., Nakafuku, M., Rowitch, D., and Guillemot, F. (2007). The  
517 proneural gene Mash1 specifies an early population of telencephalic oligodendrocytes. *J*  
518 *Neurosci* 27(16), 4233-4242. doi: 10.1523/JNEUROSCI.0126-07.2007.
- 519 Peron, S., and Berninger, B. (2015). Reawakening the sleeping beauty in the adult brain:  
520 neurogenesis from parenchymal glia. *Curr Opin Genet Dev* 34, 46-53. doi:  
521 10.1016/j.gde.2015.07.004.
- 522 Poitras, L., Ghanem, N., Hatch, G., and Ekker, M. (2007). The proneural determinant MASH1  
523 regulates forebrain Dlx1/2 expression through the I12b intergenic enhancer. *Development*  
524 134(9), 1755-1765. doi: 10.1242/dev.02845.
- 525 Quan, X.J., Yuan, L., Tiberi, L., Claeys, A., De Geest, N., Yan, J., et al. (2016). Post-translational  
526 Control of the Temporal Dynamics of Transcription Factor Activity Regulates Neurogenesis.  
527 *Cell* 164(3), 460-475. doi: 10.1016/j.cell.2015.12.048.
- 528 Raposo, A., Vasconcelos, F.F., Drechsel, D., Marie, C., Johnston, C., Dolle, D., et al. (2015). Ascl1  
529 Coordinately Regulates Gene Expression and the Chromatin Landscape during Neurogenesis.  
530 *Cell Rep* 10(9), 1544-1556. doi: 10.1016/j.celrep.2015.02.025.
- 531 Sharif, N., Calzolari, F., and Berninger, B. (2021). Direct In Vitro Reprogramming of Astrocytes into  
532 Induced Neurons. *Methods Mol Biol* 2352, 13-29. doi: 10.1007/978-1-0716-1601-7\_2.
- 533 Sirko, S., Behrendt, G., Johansson, P.A., Tripathi, P., Costa, M., Bek, S., et al. (2013). Reactive glia  
534 in the injured brain acquire stem cell properties in response to sonic hedgehog. [corrected].  
535 *Cell Stem Cell* 12(4), 426-439. doi: 10.1016/j.stem.2013.01.019.
- 536 Su, Z., Niu, W., Liu, M.L., Zou, Y., and Zhang, C.L. (2014). In vivo conversion of astrocytes to  
537 neurons in the injured adult spinal cord. *Nat Commun* 5, 3338. doi: 10.1038/ncomms4338.
- 538 Wang, L.L., Serrano, C., Zhong, X., Ma, S., Zou, Y., and Zhang, C.L. (2021). Revisiting astrocyte to  
539 neuron conversion with lineage tracing in vivo. *Cell*. doi: 10.1016/j.cell.2021.09.005.
- 540 Wapinski, O.L., Vierbuchen, T., Qu, K., Lee, Q.Y., Chanda, S., Fuentes, D.R., et al. (2013).  
541 Hierarchical mechanisms for direct reprogramming of fibroblasts to neurons. *Cell* 155(3),  
542 621-635. doi: 10.1016/j.cell.2013.09.028.
- 543 Woods, L.M., Ali, F.R., Gomez, R., Chernukhin, I., Marcos, D., Parkinson, L.M., et al. (2022).  
544 Elevated ASCL1 activity creates de novo regulatory elements associated with neuronal  
545 differentiation. *BMC Genomics* 23(1), 255. doi: 10.1186/s12864-022-08495-8.

546

547 **Author Contributions**

548 Methodology, investigation and formal analysis C.G., N.M., S.P.; Writing – Original Draft, C.G.,  
549 N.M., S.P.; Funding Acquisition, Conceptualization, Visualization, Writing – Review and Editing,  
550 C.S., B.B., S.P. All authors contributed to the article and approved the submitted version.

## 551 **Funding**

552 This study was supported by grants of the German Research Foundation (BE 4182/7-1; CRC1080,  
553 project number 221828878) and Wellcome Trust (206410/Z/17/Z) to B.B. and by the  
554 Inneruniversitäre Forschungsförderung Stufe I of the Johannes Gutenberg University Mainz to S.P.;  
555 by core funding to the Francis Crick Institute from Cancer Research UK, The Medical Research  
556 Council, and the Wellcome Trust (FC001002); N.M. was supported by a fellowship from the Human  
557 Frontiers Science Program (HFSP Long-Term Fellowship, LT000646/2015).

## 558 **Acknowledgments**

559 We are grateful to the members of the Berninger laboratory for their helpful comments and critical  
560 feedback over the course of this study. We acknowledge support by the Microscopy Core Facility of  
561 the Institute of Molecular Biology (IMB) Mainz.

## 562 **Data availability statement**

563 The original contributions presented in the study are included in the article/Material, further inquiries  
564 can be directed to the corresponding author.

565

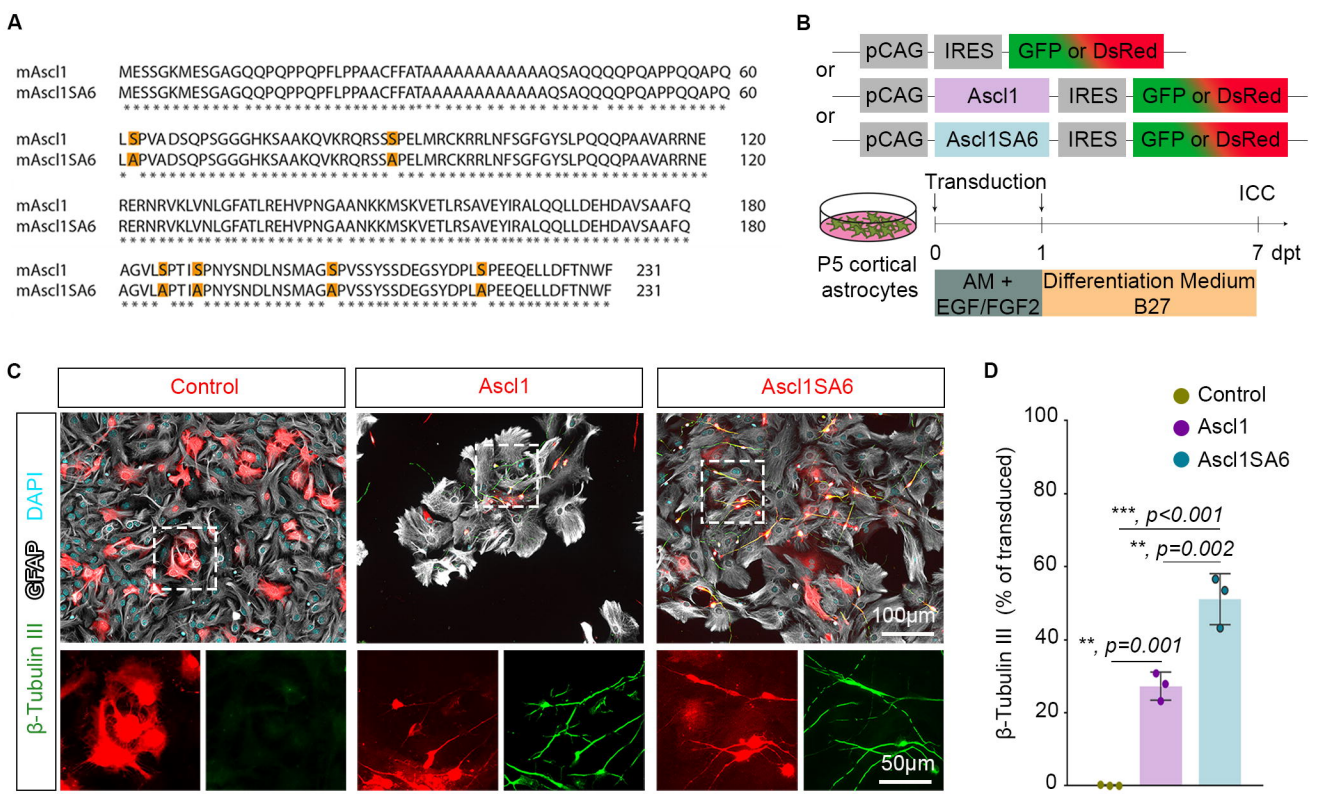

Figure 1

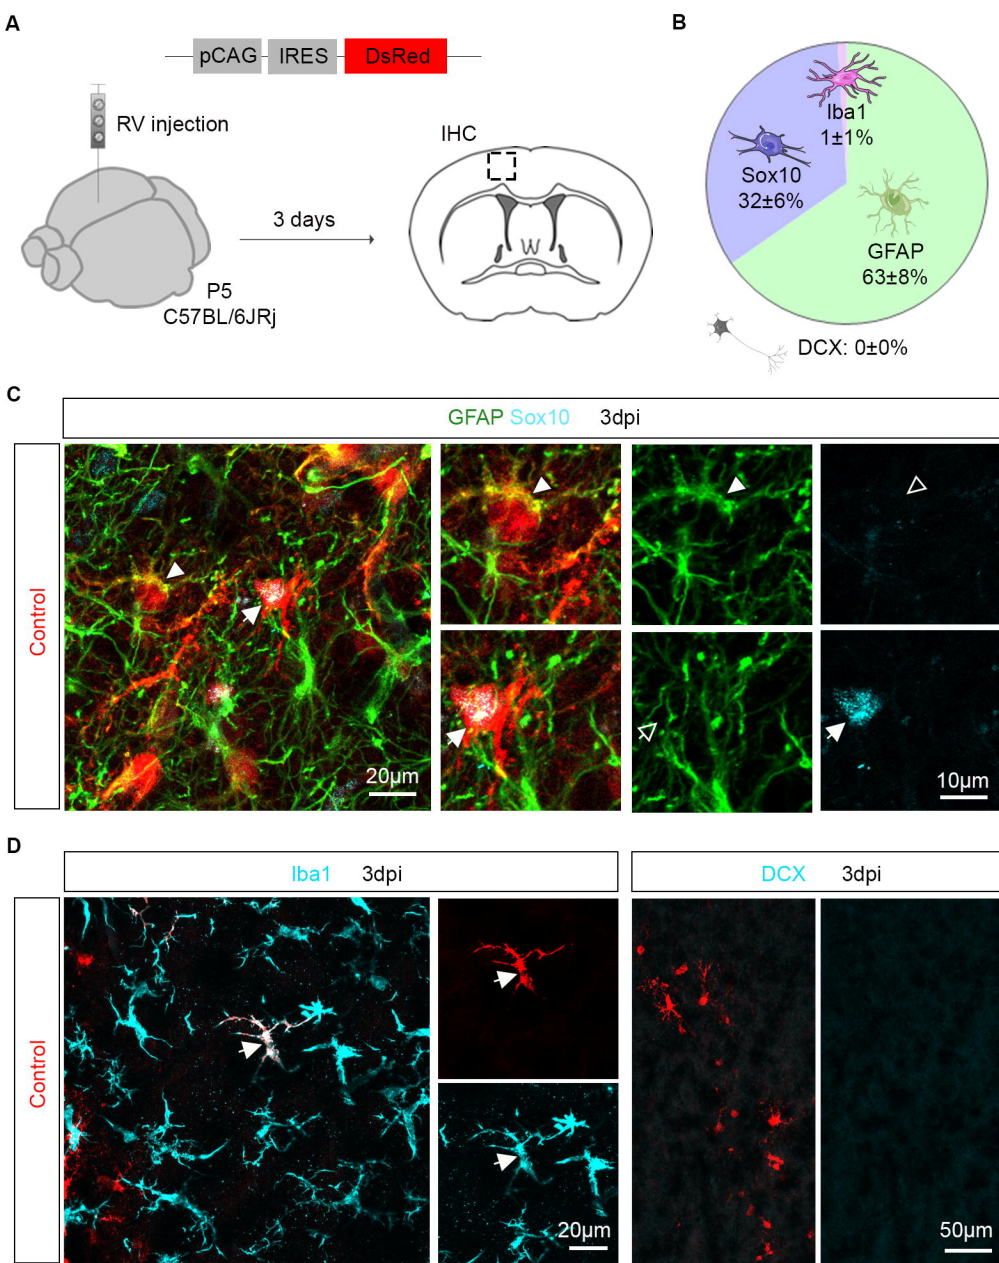

Figure 2



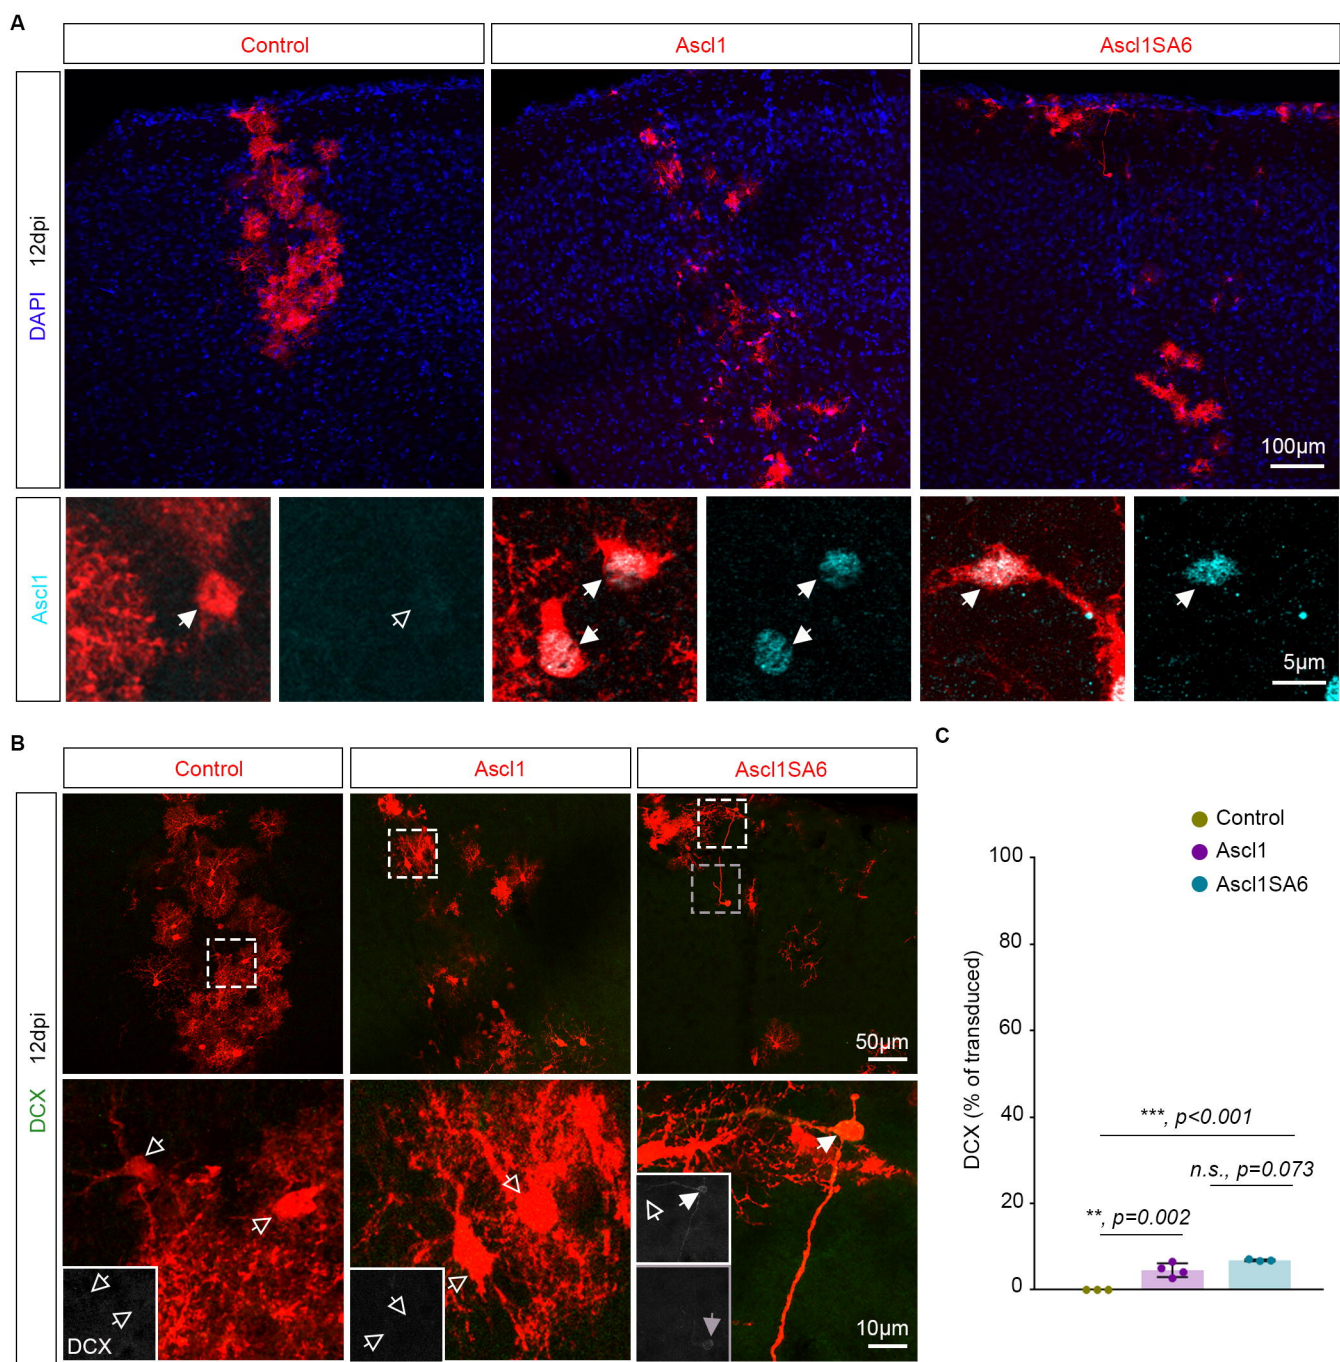

Figure 3

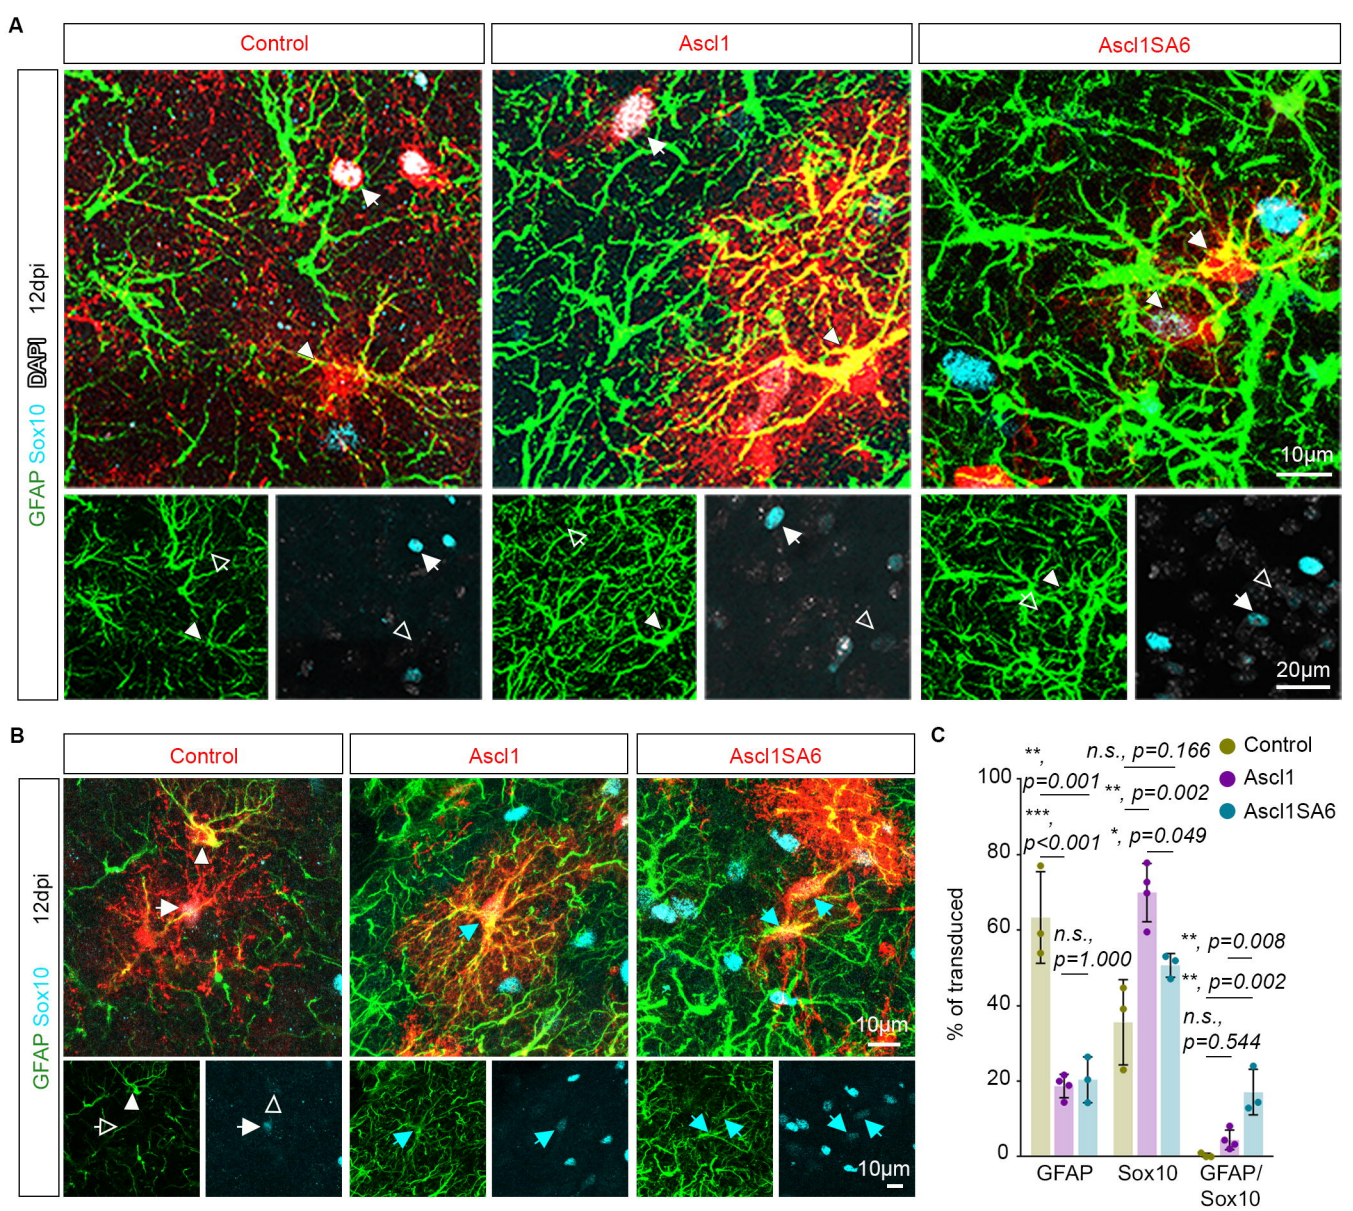

Figure 4
